# Supplementary material for: Evaluation of Plasmodium vivax malaria recurrence in Brazil
Source: Malar J. 2019 Jan 22;18:18. doi: 10.1186/s12936-019-2644-y (PMC6343355; doi:10.1186/s12936-019-2644-y)
Supplement: Supplementary file 2 — Additional file 2. SIVEP form. [file 12936_2019_2644_MOESM2_ESM.pdf]

## DADOS DA NOTIFICAÇÃO

|    |                             |    |                        |   |                                  |   |                 |
|----|-----------------------------|----|------------------------|---|----------------------------------|---|-----------------|
| 2  | Data da Notificação:        | 3  | Tipo de Detecção:      | 4 | Sintomas:                        | 5 | UF Notificação: |
|    |                             |    | 1-Passiva 2-Ativa      |   | 1-Com sintomas<br>2-Sem sintomas |   |                 |
| 6  | Município da Notificação:   | 7  | Cód. Mun. Notificação: |   |                                  |   |                 |
| 8  | Unidade Notificante:        | 9  | Código da Unidade:     |   |                                  |   |                 |
| 10 | Nome do Agente Notificante: | 11 | Código do Agente:      |   |                                  |   |                 |

## DADOS DO PACIENTE

|    |                                          |                                                                                                                                                                                                                                                                          |                                                            |                                                                                                    |                                                                 |             |                   |
|----|------------------------------------------|--------------------------------------------------------------------------------------------------------------------------------------------------------------------------------------------------------------------------------------------------------------------------|------------------------------------------------------------|----------------------------------------------------------------------------------------------------|-----------------------------------------------------------------|-------------|-------------------|
| 12 | Nome do Paciente:                        |                                                                                                                                                                                                                                                                          |                                                            |                                                                                                    |                                                                 |             |                   |
| 13 | Nº Cartão Nacional de Saúde:             | 14                                                                                                                                                                                                                                                                       | Data de Nascimento:                                        | 15                                                                                                 | Idade:                                                          |             | Dia<br>Mes<br>Ano |
| 16 | Sexo:                                    | 17                                                                                                                                                                                                                                                                       | Paciente é gestante?                                       | 1-1º Trimestre 2-2º Trimestre 3-3º Trimestre<br>4-Idade gestacional ignorada 5-Não 6-Não se aplica |                                                                 |             |                   |
| 18 | Escolaridade:                            | 0-Analfabeto 1-1ª a 4ª série incompleta do EF 2-4ª série completa do EF 3-5ª a 8ª série incompleta do EF 4-Ensino fundamental completo<br>5-Ensino médio incompleto 6-Ensino médio completo 7-Educação superior incompleto 8-Educação superior completa 10-Não se aplica |                                                            |                                                                                                    |                                                                 |             |                   |
| 19 | Raça/Cor:                                | 20                                                                                                                                                                                                                                                                       | Nome da mãe:                                               | 1-Branca 2-Preta 3-Amarela 4-Parda 5-Indígena                                                      |                                                                 |             |                   |
| 21 | Principal Atividade nos Últimos 15 Dias: | 1-Agricultura 2-Pecuária 3-Doméstica 4-Turismo 5-Garimpagem 6-Exploração vegetal<br>7-Caça/pesca 8-Construção de estradas/barragens 9-Mineração 10-Viajante 11-Outros                                                                                                    |                                                            |                                                                                                    |                                                                 |             |                   |
| 22 | Endereço do Paciente:                    | 23                                                                                                                                                                                                                                                                       | Outro País de Residência:                                  |                                                                                                    |                                                                 |             |                   |
| 24 | UF Residência:                           | 25                                                                                                                                                                                                                                                                       | Município de Residência:                                   | 26                                                                                                 | Cód. Mun. Resid:                                                |             |                   |
| 27 | Localidade de Residência:                | 28                                                                                                                                                                                                                                                                       | Cód. Localid. Resid:                                       |                                                                                                    |                                                                 |             |                   |
| 29 | Data dos Primeiros Sintomas:             | 30                                                                                                                                                                                                                                                                       | Recebeu tratamento para malária vivax nos últimos 60 dias? | 31                                                                                                 | Recebeu tratamento para malária falciparum nos últimos 40 dias? | 1-Sim 2-Não |                   |

## LOCAL PROVÁVEL DA INFECÇÃO

|    |                                  |    |                               |  |  |  |  |
|----|----------------------------------|----|-------------------------------|--|--|--|--|
| 32 | Outro País Provável de Infecção: | 33 | UF Provável de Infecção:      |  |  |  |  |
| 34 | Município Provável de Infecção:  | 35 | Cód. Mun. Provável Infecção:  |  |  |  |  |
| 36 | Localidade Provável de Infecção: | 37 | Cód. Localid. Prov. Infecção: |  |  |  |  |

## DADOS DO EXAME

|    |                                                                                                                                            |                                                                                                 |                                            |    |                                                                                             |                                   |                                 |
|----|--------------------------------------------------------------------------------------------------------------------------------------------|-------------------------------------------------------------------------------------------------|--------------------------------------------|----|---------------------------------------------------------------------------------------------|-----------------------------------|---------------------------------|
| 38 | Data do Exame:                                                                                                                             | 39                                                                                              | Tipo de exame:                             | 40 | Resultado do Exame:                                                                         | 41                                | Parasitas por mm <sup>3</sup> : |
|    |                                                                                                                                            |                                                                                                 | 1-Gota espessa/Esfregaço<br>2-Teste rápido |    | 1- Negativo; 2- F; 3- F+FG; 4- V; 5- F+V;<br>6- V+FG; 7- FG; 8- M; 9- F+M; 10- Ov; 11-Não F |                                   |                                 |
| 42 | Parasitemia em "cruzes".:                                                                                                                  | 43                                                                                              |                                            |    |                                                                                             | Outros Hemoparasitos Pesquisados: |                                 |
|    | 1- < +/2 (menor que meia cruz); 2- +/2 (meia cruz); 3- + (uma cruz);<br>4- ++ (duas cruzes); 5- +++ (três cruzes); 6- ++++ (quatro cruzes) | 1-Negativo 2-Trypanosoma sp. 3-Microfilária<br>4-Trypanosoma sp.+Microfilária 9-Não pesquisados |                                            |    |                                                                                             |                                   |                                 |
| 44 | Nome do Examinador:                                                                                                                        | 45                                                                                              | Cód Examinador:                            |    |                                                                                             |                                   |                                 |

## TRATAMENTO

|                                                                                                                                                                                                                                                                                                                                                                                                                                                                                                                                                                                                                                                                                                                                                                                                                                                                                                                                                                                                                                                                                                                                                                                                                                                                                                                                                                                                                                                                                                           |                                                                                 |    |                            |
|-----------------------------------------------------------------------------------------------------------------------------------------------------------------------------------------------------------------------------------------------------------------------------------------------------------------------------------------------------------------------------------------------------------------------------------------------------------------------------------------------------------------------------------------------------------------------------------------------------------------------------------------------------------------------------------------------------------------------------------------------------------------------------------------------------------------------------------------------------------------------------------------------------------------------------------------------------------------------------------------------------------------------------------------------------------------------------------------------------------------------------------------------------------------------------------------------------------------------------------------------------------------------------------------------------------------------------------------------------------------------------------------------------------------------------------------------------------------------------------------------------------|---------------------------------------------------------------------------------|----|----------------------------|
| 46                                                                                                                                                                                                                                                                                                                                                                                                                                                                                                                                                                                                                                                                                                                                                                                                                                                                                                                                                                                                                                                                                                                                                                                                                                                                                                                                                                                                                                                                                                        | Esquema de tratamento utilizado, de acordo com Manual de Terapêutica da Malária | 47 | Data Início do Tratamento: |
| 1- Infecções pelo P. vivax ou P. ovale com cloroquina em 3 dias e primaquina em 7 dias (esquema curto);<br>2- Infecções pelo P. vivax, ou P. ovale com cloroquina em 3 dias e primaquina em 14 dias (esquema longo);<br>3- Infecções pelo P. malariae para todas as idades e por P. vivax ou P. ovale em gestantes e crianças com menos de 6 meses, com cloroquina em 3 dias;<br>4- Prevenção das recaídas frequentes por P. vivax ou P. ovale com cloroquina semanal em 12 semanas;<br>5- Infecções por P. falciparum com a combinação fixa de artemeter+lumefantrina em 3 dias;<br>6- Infecções por P. falciparum com a combinação fixa de artesunato+mefloquina em 3 dias;<br>7- Infecções por P. falciparum com quinina em 3 dias, doxiciclina em 5 dias e primaquina no 6º dia;<br>8- Infecções mistas por P. falciparum e P. vivax ou P. ovale com Artemeter + Lumefantrina ou Artesunato + Mefloquina em 3 dias e Primaquina em 7 dias;<br>9- Infecções não complicadas por P. falciparum no 1º trimestre da gestação e crianças com menos de 6 meses, com quinina em 3 dias e clindamicina em 5 dias;<br>10- Malária grave e complicada pelo P. falciparum em todas as faixas etárias;<br>11- Infecções por P. falciparum com a combinação fixa de artesunato+lumefantrina em 3 dias e primaquina em dose única;<br>12- Infecções por P. falciparum com a combinação fixa de artesunato+mefloquina em 3 dias e primaquina em dose única;<br>99- Outro esquema utilizado (por médico) - descrever: |                                                                                 |    |                            |

SMS-UF  
MUNICÍPIO

|    |                   |    |                     |
|----|-------------------|----|---------------------|
| 12 | Nome do Paciente: | 15 | Idade:              |
| 1  | Nº da Notificação | 38 | Data do Exame       |
|    |                   | 40 | Resultado do Exame  |
|    |                   | 44 | Nome do Examinador: |
